# Supplementary material for: Structure-regulated tough elastomers of liquid crystalline inorganic nanosheet/polyurethane nanocomposites
Source: Royal Society of Chemistry journal article supplement (doi:10.1039/d0ma00768d), 2020-12-29
Supplement: d0ma00768d1.pdf [file d0ma00768d1.pdf]

# **Structure-regulated tough elastomer of liquid crystalline inorganic nanosheets/polyurethane nanocomposite**

Toki Morooka<sup>a</sup>, Yutaka Ohstedo<sup>b,\*</sup>, Riki Kato<sup>c</sup> and Nobuyoshi Miyamoto<sup>a\*</sup>

<sup>a</sup>Department of Life, Environment and Applied Chemistry, the Graduate School of Engineering, Fukuoka Institute of Technology, 3-30-1, Wajirohigashi, Higashiku, Fukuoka 811-0295, Japan.

<sup>b</sup>Department of Computer Science and Clothing Environment, Faculty of Human Life and Environment, Nara Women's University, Kita-uoyahigashi-machi, Nara 630-8506, Japan.

<sup>c</sup>Department of Material Science and Production Engineering, the Graduate School of Engineering, Fukuoka Institute of Technology, 3-30-1, Wajirohigashi, Higashiku, Fukuoka 811-0295, Japan.

## Supporting Information 1

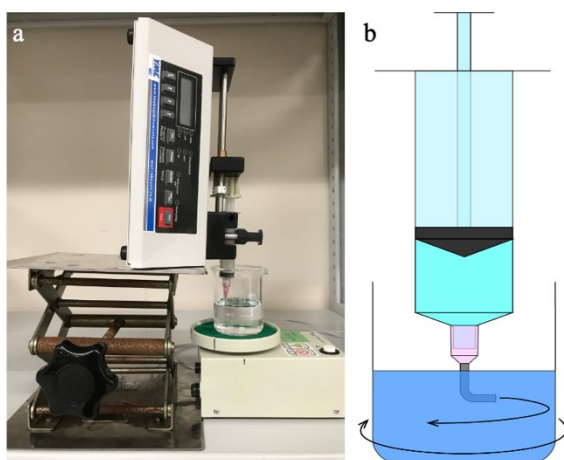

Figure S1. (a) Photograph and (b) schematic illustration of fiber synthesis device.

## Supporting Information 2

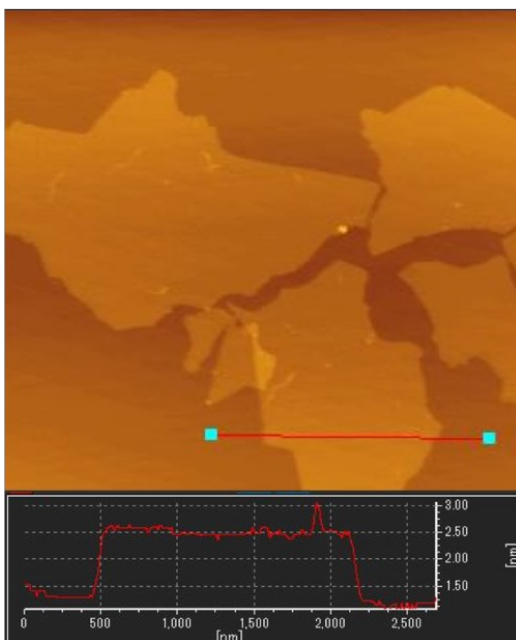

Figure S2. The AFM image of the FHT nanosheets. The nanosheets/water/DMF colloid was cast and dried on mica substrate for the observation. In the height profile of the AFM image, base height is  $\sim 1.3$  nm and the nanosheet top height is 2.5 nm so that the thickness is evaluated as  $\sim 1.2$  nm. Considering the crystallographic thickness of the clay nanosheets (1.0 nm) and the diameter of counter cation  $\text{Na}^+$  (0.10 nm), this result confirms that nanosheet is single layer without stacking.

### Supporting Information 3

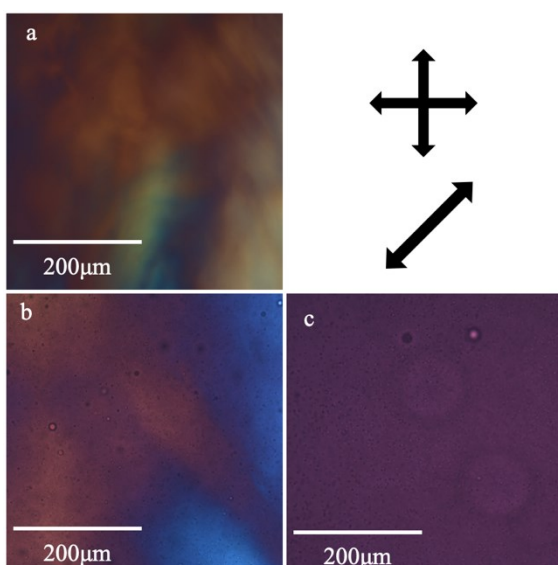

Figure S3. POM images of (a) nanosheet (4.44 wt%)/water/DMF colloid, (b) nanosheet (2.22 wt%)/prepolymer (21 wt%)/water/DMF colloidal solution, and (c) prepolymer (41.4 wt%)/DMF solution. Molar ratio of water to DMF in the colloids is 2:8.

## Supporting Information 4

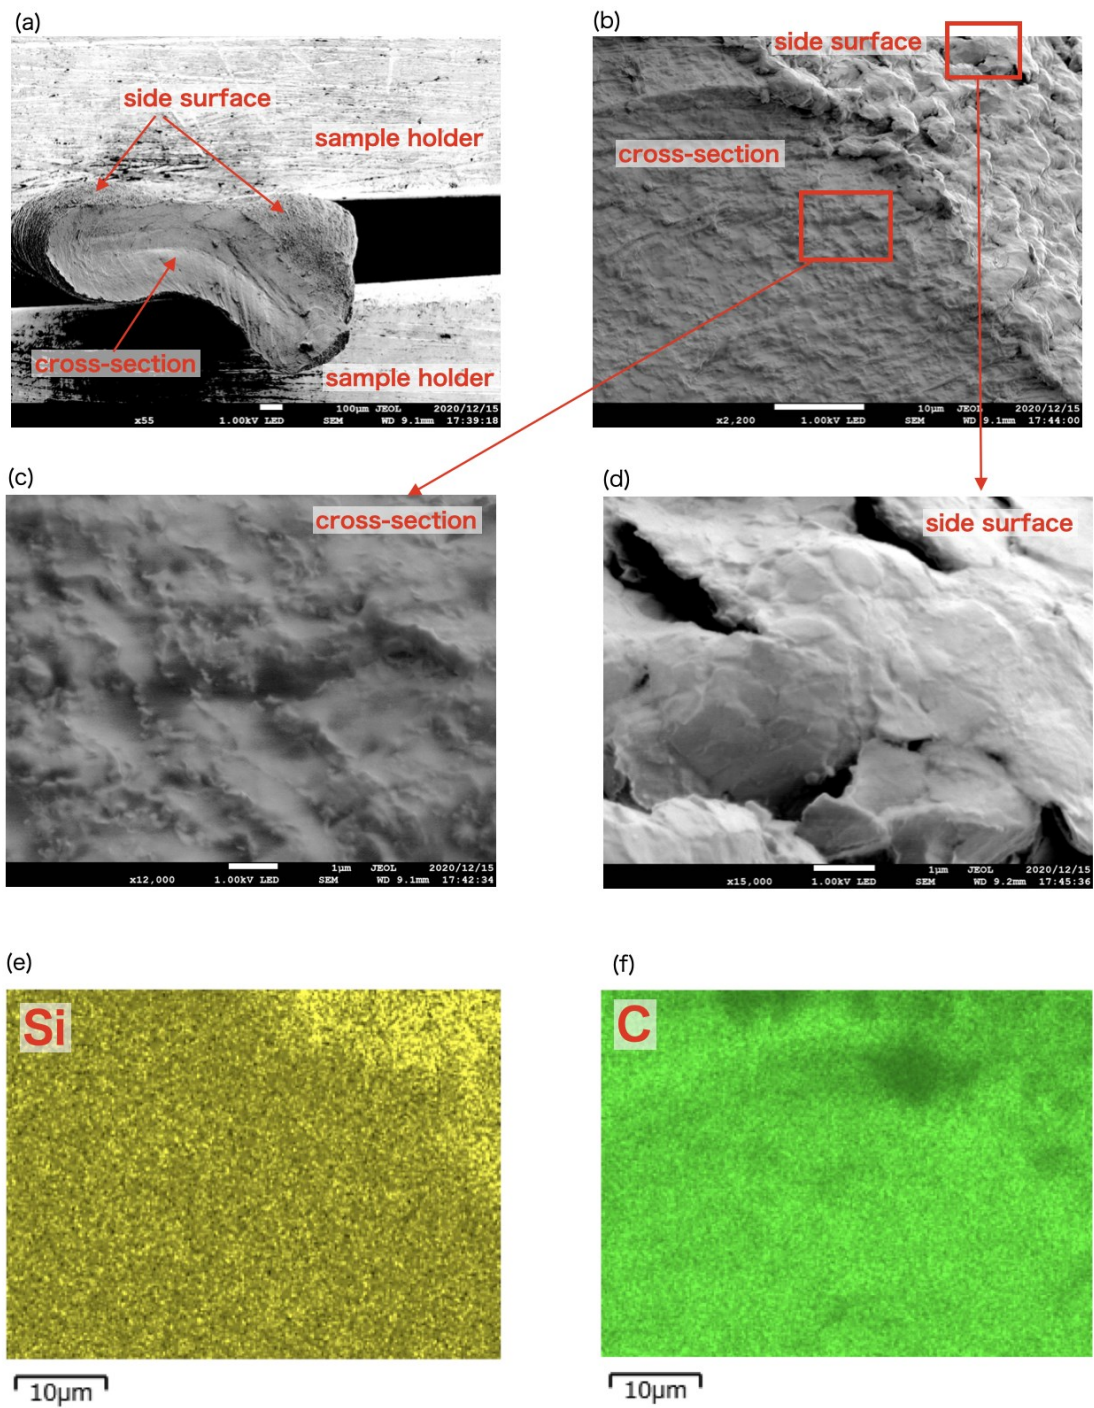

**Figure S4** (a)-(d) SEM and (e)(f) EDS mapping images of the nanosheets/polyurethane nanocomposite fibers loaded with 5 wt% of the nanosheets. The EDS images corresponds to the image (b).

## Supporting Information 5

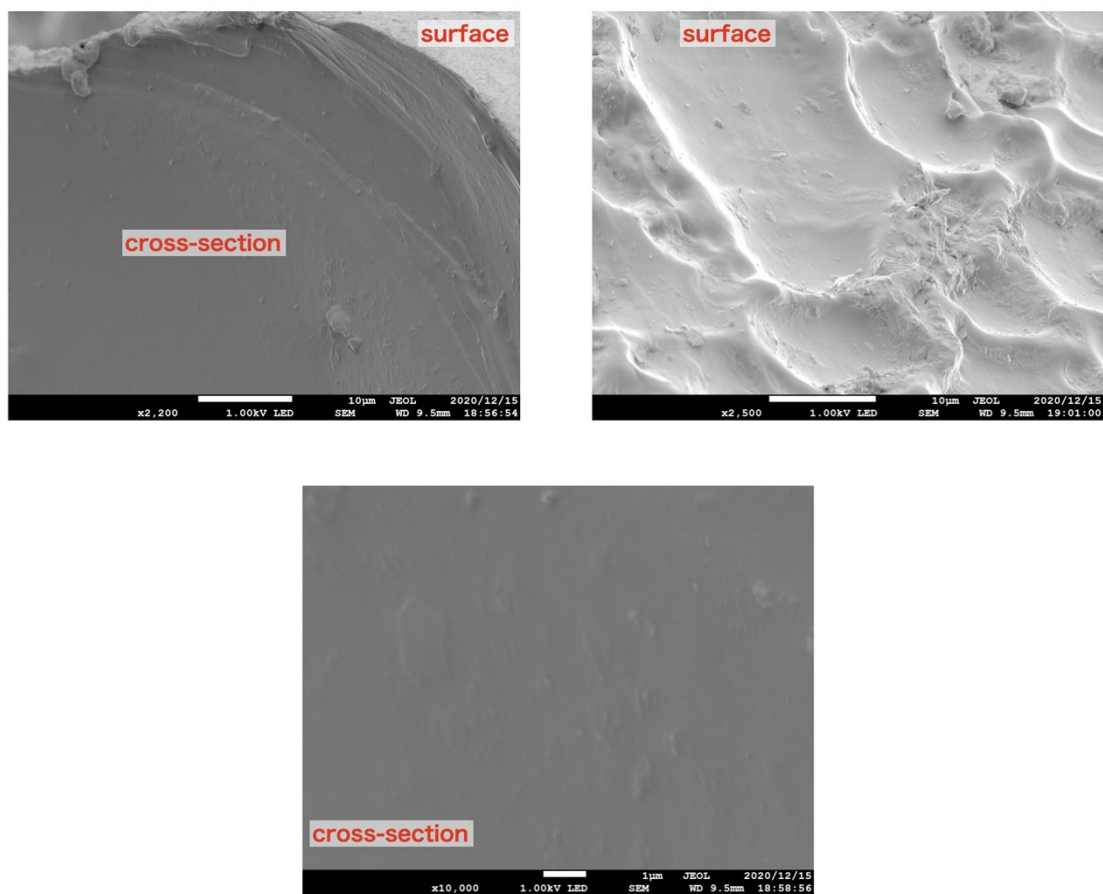

**Figure S5** SEM images of the pristine polyurethane fiber without nanosheets. (b) and (c) are the magnified images of (a)
